# Supplementary material
Source: HighWire-hosted journal article supplement (https://openres.ersjournals.com/content/9/3/00569-2022)
Supplement: inline-supplementary-material-1 [file inline-supplementary-material-1.pdf]

## Supplements

**Table S1. Rome proposal criteria for classifying the severity of ECOPD**

| Severity                                                 | Criteria for assessing ECOPD severity                                                                                                                                                                               |
|----------------------------------------------------------|---------------------------------------------------------------------------------------------------------------------------------------------------------------------------------------------------------------------|
| <b>Mild</b>                                              | <ul style="list-style-type: none"> <li>• Dyspnea VAS &lt;5</li> <li>• RR &lt;24 breaths/min</li> <li>• HR &lt;95 bmp</li> <li>• Resting SaO<sub>2</sub> ≥ 92%* and change ≤3%</li> <li>• CRP &lt;10 mg/L</li> </ul> |
| <b>Moderate (at least three out of five)<sup>†</sup></b> | <ul style="list-style-type: none"> <li>• Dyspnea VAS ≥5</li> <li>• RR ≥24 breaths/min</li> <li>• HR ≥95 bpm</li> <li>• Resting SaO<sub>2</sub> &lt;92%* and/or change &gt;3%</li> <li>• CRP ≥10 mg/L</li> </ul>     |
| <b>Severe</b>                                            | <ul style="list-style-type: none"> <li>• ABG demonstrate hypercapnia and acidosis (PaCO<sub>2</sub> &gt;45 mmHg and pH &lt;7.35)</li> </ul>                                                                         |

\* : Patient breathing ambient air or the usual oxygen prescription.

† : In addition, if obtained, ABG may show hypoxemia (PaO<sub>2</sub> ≤60 mmHg), hypercapnia (PaCO<sub>2</sub> >45 mmHg) or both, but no acidosis (pH >7.35)

ECOPD= exacerbation of chronic obstructive pulmonary disease; VAS= visual analog scale; RR= respiratory rate; HR= heart rate; CRP= C-reactive protein; ABG=arterial blood gases

**Table S2. Between-group differences of Rome proposal criteria within ECOPD severity classes**

| Group comparisons            | Mild-Moderate <sup>±</sup> | Mild-Severe <sup>±</sup> | Moderate-Severe <sup>±</sup> | P value <sup>†</sup> |
|------------------------------|----------------------------|--------------------------|------------------------------|----------------------|
| HR, bpm                      | <0.001                     | <0.001                   | 0.190                        | <0.001               |
| RR, breaths/min              | 0.001                      | <0.001                   | 0.292                        | <0.001               |
| Resting SaO <sub>2</sub> %   | 0.010                      | <0.001                   | 0.063                        | <0.001               |
| CRP levels, mg/L             | <0.001                     | <0.001                   | 0.131                        | <0.001               |
| ABG PaO <sub>2</sub> , mmHg  | 0.017                      | 0.161                    | 1.000                        | 0.022                |
| ABG PaCO <sub>2</sub> , mmHg | 1.000                      | <0.001                   | <0.001                       | <0.001               |
| pH                           | 1.000                      | <0.001                   | <0.001                       | <0.001               |

ABG, arterial blood gas; bpm, beats per minute; CRP, C-reactive protein; HR, heart rate; RR, respiratory rate; SaO<sub>2</sub>, oxygen saturation measured in arterial blood gas;

† Kruskal-Wallis

± Dunn's Bonferroni

**Table S3. Between-group differences of clinical parameters**

| Characteristics (n)                   | Mild/Moderate <sup>‡</sup> | Mild/Severe <sup>‡</sup> | Moderate/Severe <sup>‡</sup> | P value <sup>†</sup> |
|---------------------------------------|----------------------------|--------------------------|------------------------------|----------------------|
| Lung function                         |                            |                          |                              |                      |
| FEV <sub>1</sub> litres               | 0.944                      | 0.011                    | 0.015                        | 0.004                |
| FEV <sub>1</sub> pred%                | 0.623                      | 0.007                    | 0.023                        | 0.004                |
| FEV <sub>1</sub> / FVC                | 0.350                      | 0.014                    | 0.143                        | 0.013                |
| Body box                              |                            |                          |                              |                      |
| RV/TLC pred%                          | 0.131                      | 0.003                    | 0.122                        | 0.004                |
| Diffusion                             |                            |                          |                              |                      |
| DLCO/SB pred%                         | 1.000                      | 0.376                    | 0.007                        | 0.009                |
| Comorbidities                         |                            |                          |                              |                      |
| Charlson's index                      | 0.029                      | 0.238                    | 1.000                        | 0.035                |
| Vital signs                           |                            |                          |                              |                      |
| Temperature, C                        | <0.001                     | 0.648                    | 0.003                        | <0.001               |
| Extra FiO <sub>2</sub> (46/177/91)    | 1.000                      | 0.004                    | <0.001                       | <0.001               |
| Physical examination                  |                            |                          |                              |                      |
| Use of accessory muscles<br>(3/15/16) | 0.056                      | 0.051                    | 1.000                        | 0.031*               |
| Elevated CVP (20/62/37)               | 1.000                      | 0.111                    | 0.031                        | 0.040*               |
| Troponin >14 ng/L<br>(52/204/108)     | 0.133                      | 0.043                    | 0.139                        | 0.041 <sup>o</sup>   |
| Chest X-ray                           |                            |                          |                              |                      |
| Consolidation (51/204/108)            | 0.002                      | 0.013                    | 0.613                        | 0.003 <sup>o</sup>   |
| Signs of congestion<br>(51/204/108)   | 0.312                      | 0.017                    | 0.009                        | 0.002 <sup>o</sup>   |

Data represent the p-values for between-group differences. Three groups were compared with each other: mild/moderate, mild/severe and moderate/severe. BMI, body mass index; BP, blood pressure; CCI, Charlson's comorbidity index; CVP, central venous pressure; DLCO/SB, single-breath diffusing capacity of the lung for carbon monoxide; ECG, electrocardiogram; FEV<sub>1</sub>, forced expiratory volume in 1s; FEV<sub>1</sub>/VC, ratio FEV<sub>1</sub>/VC; FiO<sub>2</sub>, fraction of inspired oxygen; NT-proBNP, brain natriuretic peptide; pred%, percentage of predicted value; RV/TLC, ratio residual volume and total lung capacity; SpO<sub>2</sub>, oxygen saturation measured by pulse oximetry.

† Kruskal-Wallis, unless otherwise stated

± Dunn's Bonferroni, unless otherwise stated

<sup>o</sup> Chi-square

\* Fisher's exact test

Bonferroni-adjusted p-values 0.05/3=0.017
